# Supplementary material for: Darwin’s naturalization hypothesis does not explain the spread of nonnative weed species naturalized in México
Source: PeerJ. 2018 Aug 17;6:e5444. doi: 10.7717/peerj.5444 (PMC6100849; doi:10.7717/peerj.5444)
Supplement: Data S1 — First worksheet: the database for 278 nonnative species of herbs and subshrubs used for NMDS and rCOSA analyses; Second worksheet: list of species and acronym; Third worksheet: the database for 27 nonnative species of trees and shrubshrubs; and Fourth worksheet: biological attributes and other features keys for all species. [file peerj-06-5444-s001.xlsx]

## Sheet: DATABASE HEAT MAP
NUM	ACRO	FAM	A	P	AB	AP	*ABP	*BP	HE	VH	*SS	MO	DI	*CHA	GEO	HEM	*HYD	THE	DE	ID	DF	*FF	AC	CA	CR	CY	*BE	LE	*LM	*PY	SI	*UT	AN	AU	BA	HY	ZO	N	AV	H	MU	VS	S	M	L	VL	COM	*CRA	ER
1	ATPAT	AM	1	0	0	0	0	0	1	0	0	0	1	0	0	0	0	1	0	1	1	0	0	0	0	0	0	0	0	0	0	1	1	0	0	0	1	0	0	1	0	0	0	1	0	0	1	0	0
2	ATROS	AM	1	0	0	0	0	0	1	0	0	0	1	0	0	0	0	1	0	1	1	0	0	0	0	0	0	0	0	0	0	1	1	0	0	0	1	0	0	1	0	0	1	0	0	0	0	0	0
3	ATSEM	AM	0	1	0	0	0	0	1	0	1	0	1	1	0	0	0	0	0	1	1	0	0	0	0	0	0	0	0	0	0	1	0	0	0	0	1	0	0	1	0	0	0	1	0	0	0	0	1
4	ATSUB	AM	0	0	0	1	0	0	1	0	0	0	1	0	0	1	0	0	0	1	1	0	0	0	0	0	0	0	0	0	0	1	0	0	0	0	1	0	0	1	0	0	0	1	0	0	0	0	1
5	BAHYS	AM	1	0	0	0	0	0	1	0	0	0	1	0	0	0	0	1	0	1	1	0	0	0	0	0	0	0	0	0	0	1	1	0	0	1	1	0	0	1	0	0	1	0	0	0	0	0	0
6	BEVUL	AM	0	0	1	0	0	0	1	0	0	0	1	0	1	0	0	0	0	1	1	0	1	0	0	0	0	0	0	0	0	0	0	1	1	0	0	1	1	0	0	0	1	0	0	0	0	0	0
7	CHGIG	AM	1	0	0	0	0	0	1	0	0	0	1	0	0	0	0	1	0	1	1	0	0	0	0	0	0	0	0	0	0	1	0	0	1	0	0	1	0	0	0	1	0	0	0	0	1	0	0
8	CHGLA	AM	1	0	0	0	0	0	1	0	0	0	1	0	0	0	0	1	0	1	1	0	1	0	0	0	0	0	0	0	0	0	0	0	1	0	0	1	0	0	0	1	0	0	0	0	1	1	0
9	CHMUR	AM	1	0	0	0	0	0	1	0	0	0	1	0	0	0	0	1	0	1	1	0	1	0	0	0	0	0	0	0	0	0	0	0	1	0	0	1	0	0	0	1	0	0	0	0	0	0	0
10	KOCSC	AM	1	0	0	0	0	0	1	0	0	0	1	0	0	0	0	1	0	1	1	0	0	0	0	0	0	0	0	0	0	1	1	0	0	0	1	0	0	1	0	0	1	0	0	0	1	0	0
11	SALTR	AM	0	0	0	1	0	0	1	0	0	0	1	0	1	0	0	0	0	1	1	0	0	0	0	0	0	0	0	0	0	1	1	1	0	0	1	0	1	1	0	0	0	0	1	0	0	0	0
12	ANTCO	AS	1	0	0	0	0	0	1	0	0	0	1	0	0	0	0	1	0	1	1	0	0	0	0	1	0	0	0	0	0	0	1	0	0	0	0	0	0	1	0	0	1	0	0	0	0	0	0
13	ARTAB	AS	0	1	0	0	0	0	1	0	1	0	1	1	0	0	0	0	0	1	1	0	0	0	0	1	0	0	0	0	0	0	1	1	1	0	1	1	1	1	1	1	0	0	0	0	1	0	0
14	BELPE	AS	0	0	0	1	0	0	1	0	0	0	1	0	0	1	0	0	0	1	1	0	0	0	0	1	0	0	0	0	0	0	1	0	1	0	0	1	0	1	0	1	0	0	0	0	0	0	0
15	CALOF	AS	0	0	0	1	0	0	1	0	0	0	1	0	0	1	0	0	0	1	1	0	0	0	0	1	0	0	0	0	0	0	0	0	1	0	1	1	0	1	0	0	0	0	1	0	0	0	0
16	CARTI	AS	1	0	0	0	0	0	1	0	0	0	1	0	0	0	0	1	0	1	1	0	0	0	0	1	0	0	0	0	0	0	1	0	1	0	1	1	0	1	0	0	0	0	1	0	1	0	0
17	CNIBE	AS	1	0	0	0	0	0	1	0	0	0	1	0	0	0	0	1	0	1	1	0	0	0	0	1	0	0	0	0	0	0	1	0	0	0	1	0	0	1	0	0	0	0	1	0	0	0	0
18	CENME	AS	1	0	0	0	0	0	1	0	0	0	1	0	0	0	0	1	0	1	1	0	0	0	0	1	0	0	0	0	0	0	1	0	0	0	1	0	0	1	0	0	1	0	0	0	0	0	0
19	CENSO	AS	1	0	0	0	0	0	1	0	0	0	1	0	0	0	0	1	0	1	1	0	0	0	0	1	0	0	0	0	0	0	1	0	1	0	1	1	0	1	0	0	0	1	0	0	0	0	0
20	CHYCO	AS	1	0	0	0	0	0	1	0	0	0	1	0	0	0	0	1	0	1	1	0	0	0	0	1	0	0	0	0	0	0	1	0	0	0	1	0	0	1	0	0	1	0	0	0	1	0	0
21	CIINT	AS	0	1	0	0	0	0	1	0	0	0	1	0	0	1	0	0	0	1	1	0	0	0	0	1	0	0	0	0	0	0	1	0	0	0	1	0	0	1	0	0	1	0	0	0	1	0	0
22	CIRVU	AS	0	0	0	0	0	1	1	0	0	0	1	0	1	0	0	0	0	1	1	0	0	0	0	1	0	0	0	0	0	0	1	0	0	0	1	0	0	1	0	0	0	1	0	0	0	0	0
23	COTAU	AS	0	0	0	1	0	0	1	0	0	0	1	0	0	1	0	0	0	1	1	0	0	0	0	1	0	0	0	0	0	0	1	0	1	0	0	1	0	1	0	1	0	0	0	0	0	0	0
24	COTCO	AS	0	0	0	1	0	0	1	0	0	0	1	0	0	1	0	0	0	1	1	0	0	0	0	1	0	0	0	0	0	0	1	1	1	1	1	1	1	1	1	0	1	0	0	0	0	0	0
25	CYACI	AS	1	0	0	0	0	0	1	0	0	0	1	0	0	0	0	1	0	1	1	0	0	0	0	1	0	0	0	0	0	0	1	0	0	1	1	0	0	1	0	0	1	0	0	0	0	0	0
26	CYNCA	AS	0	1	0	0	0	0	1	0	0	0	1	0	1	0	0	0	0	1	1	0	0	0	0	1	0	0	0	0	0	0	1	0	0	1	1	0	0	1	0	0	0	0	1	0	1	0	0
27	DENMO	AS	0	1	0	0	0	0	1	0	1	0	1	1	0	0	0	0	0	1	1	0	0	0	0	1	0	0	0	0	0	0	1	0	1	0	1	1	0	1	0	1	0	0	0	0	1	0	0
28	EMIFO	AS	1	0	0	0	0	0	1	0	0	0	1	0	0	0	0	1	0	1	1	0	0	0	0	1	0	0	0	0	0	0	1	0	0	0	1	0	0	1	0	0	0	1	0	0	0	0	0
29	EMISO	AS	1	0	0	0	0	0	1	0	0	0	1	0	0	0	0	1	0	1	1	0	0	0	0	1	0	0	0	0	0	0	1	0	0	1	1	0	0	1	0	1	0	0	0	0	1	0	0
30	GUIAB	AS	1	0	0	0	0	0	1	0	0	0	1	0	0	0	0	1	0	1	1	0	0	0	0	1	0	0	0	0	0	0	1	0	1	0	1	1	0	1	0	0	1	0	0	0	0	0	0
31	GYNAU	AS	0	1	0	0	0	0	0	1	1	0	1	0	0	1	0	0	0	1	1	0	0	0	0	1	0	0	0	0	0	0	1	0	0	0	1	0	0	1	0	0	0	0	1	0	1	0	0
32	HEDRH	AS	1	0	0	0	0	0	1	0	0	0	1	0	0	0	0	1	0	1	1	0	0	0	0	1	0	0	0	0	0	0	1	0	0	0	1	0	0	1	0	0	0	0	1	0	0	0	0
33	HELEC	AS	0	0	0	0	1	0	1	0	0	0	1	0	0	1	0	0	0	1	1	0	0	0	0	1	0	0	0	0	0	0	1	0	0	0	1	0	0	1	0	0	0	1	0	0	0	0	0
34	HYPGL	AS	1	0	0	0	0	0	1	0	0	0	1	0	0	0	0	1	0	1	1	0	0	0	0	1	0	0	0	0	0	0	1	0	0	0	1	0	0	1	0	0	0	0	1	0	1	0	0
35	HYPRA	AS	0	1	0	0	0	0	1	0	0	0	1	0	0	1	0	0	0	1	1	0	0	0	0	1	0	0	0	0	0	0	1	0	0	1	1	0	0	1	0	0	0	0	0	1	1	0	0
36	LACSA	AS	0	0	1	0	0	0	1	0	0	0	1	0	0	1	0	0	0	1	1	0	0	0	0	1	0	0	0	0	0	0	1	0	0	0	1	0	0	1	0	0	0	1	0	0	1	0	0
37	LACSE	AS	0	0	1	0	0	0	1	0	0	0	1	0	0	1	0	0	0	1	1	0	0	0	0	1	0	0	0	0	0	0	1	0	0	0	1	0	0	1	0	0	1	0	0	0	0	0	0
38	LAPCO	AS	1	0	0	0	0	0	1	0	0	0	1	0	0	0	0	1	0	1	1	0	0	0	0	1	0	0	0	0	0	0	1	0	1	0	1	1	0	1	0	0	0	1	0	0	1	0	0
39	LAPLU	AS	1	0	0	0	0	0	1	0	0	0	1	0	0	0	0	1	0	1	1	0	0	0	0	1	0	0	0	0	0	0	1	0	0	0	1	0	0	1	0	1	0	0	0	0	0	0	0
40	LEULA	AS	0	1	0	0	0	0	1	0	0	0	1	0	0	1	0	0	0	1	1	0	0	0	0	1	0	0	0	0	0	0	1	0	1	0	1	1	0	1	0	0	0	0	1	0	0	0	0
41	LEUVU	AS	0	1	0	0	0	0	1	0	0	0	1	0	1	0	0	0	0	1	1	0	0	0	0	1	0	0	0	0	0	0	1	0	1	0	0	1	0	1	0	0	1	0	0	0	0	0	0
42	MATMA	AS	1	0	0	0	0	0	1	0	0	0	1	0	0	0	0	1	0	1	1	0	0	0	0	1	0	0	0	0	0	0	1	0	1	0	0	1	0	1	0	1	0	0	0	0	0	0	0
43	RHARE	AS	0	1	0	0	0	0	1	0	0	0	1	0	1	0	0	0	0	1	1	0	0	0	0	1	0	0	0	0	0	0	1	1	0	0	1	0	1	1	0	0	0	1	0	0	0	0	0
44	SENIN	AS	0	0	0	1	0	0	1	0	0	0	1	1	0	0	0	0	0	1	1	0	0	0	0	1	0	0	0	0	0	0	1	0	0	0	1	0	0	1	0	0	1	0	0	0	0	0	0
45	SENVU	AS	0	0	1	0	0	0	1	0	0	0	1	0	0	1	0	0	0	1	1	0	0	0	0	1	0	0	0	0	0	0	1	0	0	0	1	0	0	1	0	0	1	0	0	0	0	0	0
46	SILMA	AS	0	0	1	0	0	0	1	0	0	0	1	0	0	1	0	0	0	1	1	0	0	0	0	1	0	0	0	0	0	0	1	0	0	1	1	0	0	1	0	0	0	0	1	0	1	0	0
47	SOLAN	AS	1	0	0	0	0	0	1	0	0	0	1	0	0	0	0	1	0	1	1	0	0	0	0	1	0	0	0	0	0	0	1	1	0	1	1	0	1	1	0	0	1	0	0	0	0	0	0
48	SOLSE	AS	1	0	0	0	0	0	1	0	0	0	1	0	0	0	0	1	0	1	1	0	0	0	0	1	0	0	0	0	0	0	1	0	0	0	1	0	0	1	0	0	1	0	0	0	0	0	0
49	SONAS	AS	0	0	0	1	0	0	1	0	0	0	1	0	0	1	0	0	0	1	1	0	0	0	0	1	0	0	0	0	0	0	1	0	0	1	1	0	0	1	0	0	1	0	0	0	0	0	0
50	SONOL	AS	0	0	1	0	0	0	1	0	0	0	1	0	0	1	0	0	0	1	1	0	0	0	0	1	0	0	0	0	0	0	1	0	0	1	1	0	0	1	0	0	0	1	0	0	1	0	0
51	SONTE	AS	0	0	0	0	1	0	1	0	0	0	1	1	0	0	0	0	0	1	1	0	0	0	0	1	0	0	0	0	0	0	1	0	0	0	1	0	0	1	0	0	1	0	0	0	0	0	0
52	TANPA	AS	0	1	0	0	0	0	1	0	0	0	1	0	0	1	0	0	0	1	1	0	0	0	0	1	0	0	0	0	0	0	1	0	1	0	1	1	0	1	0	0	1	0	0	0	0	0	0
53	TAROF	AS	0	0	0	0	0	1	1	0	0	0	1	0	0	1	0	0	0	1	1	0	0	0	0	1	0	0	0	0	0	0	1	0	0	1	1	0	0	1	0	0	0	1	0	0	1	0	0
54	TRAPO	AS	0	0	1	0	0	0	1	0	0	0	1	0	1	0	0	0	0	1	1	0	0	0	0	1	0	0	0	0	0	0	1	0	0	0	1	0	0	1	0	0	0	0	0	1	1	0	0
55	YOUJA	AS	0	0	0	0	1	0	1	0	0	0	1	0	0	1	0	0	0	1	1	0	0	0	0	1	0	0	0	0	0	0	1	0	0	0	1	0	0	1	0	0	1	0	0	0	1	0	0
56	BRAJU	BR	1	0	0	0	0	0	1	0	0	0	1	0	0	0	0	1	1	0	1	0	0	0	0	0	0	0	0	0	1	0	1	1	1	0	1	1	1	1	1	0	1	0	0	0	1	0	0
57	BRANA	BR	0	0	1	0	0	0	1	0	0	0	1	0	1	0	0	0	1	0	1	0	0	0	0	0	0	0	0	0	1	0	0	1	1	0	1	1	1	1	1	0	1	0	0	0	1	0	0
58	BRANI	BR	0	0	0	0	1	0	1	0	0	0	1	0	0	1	0	0	1	0	1	0	0	0	0	0	0	0	0	0	1	0	1	1	1	1	1	1	1	1	1	0	1	0	0	0	1	0	0
59	BRARA	BR	0	0	1	0	0	0	1	0	0	0	1	0	0	1	0	0	1	0	1	0	0	0	0	0	0	0	0	0	1	0	0	1	1	0	1	1	1	1	1	0	1	0	0	0	1	0	0
60	BRATO	BR	1	0	0	0	0	0	1	0	0	0	1	0	0	0	0	1	1	0	1	0	0	0	0	0	0	0	0	0	1	0	1	1	1	1	1	1	1	1	1	1	0	0	0	0	1	0	0
61	CAKMA	BR	1	0	0	0	0	0	1	0	0	0	1	0	0	0	0	1	1	0	1	0	0	0	0	0	0	0	0	0	1	0	0	0	0	1	0	0	0	1	0	0	0	1	0	0	1	0	0
62	CAMSA	BR	0	0	1	0	0	0	1	0	0	0	1	0	0	1	0	0	1	0	1	0	0	0	0	0	0	0	0	0	1	0	1	1	1	0	1	1	1	1	1	0	1	0	0	0	1	0	0
63	CAPBU	BR	1	0	0	0	0	0	1	0	0	0	1	0	0	0	0	1	1	0	1	0	0	0	0	0	0	0	0	0	1	0	1	1	1	1	1	1	1	1	1	1	0	0	0	0	1	0	0
64	CARHI	BR	0	0	1	0	0	0	1	0	0	0	1	0	0	1	0	0	1	0	1	0	0	0	0	0	0	0	0	0	1	0	1	1	0	1	1	0	1	1	0	0	1	0	0	0	1	0	0
65	DIPMU	BR	0	0	0	0	1	0	1	0	0	0	1	0	0	1	0	0	1	0	1	0	0	0	0	0	0	0	0	0	1	0	0	1	1	0	1	1	1	1	1	1	0	0	0	0	1	0	0
66	DIPTE	BR	0	1	0	0	0	0	1	0	0	0	1	0	1	0	0	0	1	0	1	0	0	0	0	0	0	0	0	0	1	0	0	1	0	1	1	0	1	1	0	1	0	0	0	0	0	0	0
67	ERUVE	BR	0	0	1	0	0	0	1	0	0	0	1	0	0	1	0	0	1	0	1	0	0	0	0	0	0	0	0	0	1	0	0	1	1	0	0	1	1	0	0	0	1	0	0	0	1	0	0
68	ERUGA	BR	0	0	1	0	0	0	1	0	0	0	1	0	0	1	0	0	1	0	1	0	0	0	0	0	0	0	0	0	1	0	0	1	0	0	1	0	1	1	0	1	0	0	0	0	0	0	0
69	HIRIN	BR	0	0	0	0	1	0	1	0	0	0	1	0	0	1	0	0	1	0	1	0	0	0	0	0	0	0	0	0	1	0	1	1	1	0	1	1	1	1	1	1	0	0	0	0	0	0	0
70	HORPR	BR	1	0	0	0	0	0	1	0	0	0	1	0	0	0	0	1	1	0	1	0	0	0	0	0	0	0	0	0	1	0	0	1	0	1	1	0	1	1	0	1	0	0	0	0	0	0	0
71	IBEAM	BR	1	0	0	0	0	0	1	0	0	0	1	0	0	0	0	1	1	0	1	0	0	0	0	0	0	0	0	0	1	0	1	1	0	0	1	0	1	1	0	0	1	0	0	0	0	0	0
72	LEPDI	BR	0	0	1	0	0	0	1	0	0	0	1	0	0	1	0	0	1	0	1	0	0	0	0	0	0	0	0	0	1	0	0	0	1	0	0	1	0	0	0	1	0	0	0	0	1	0	0
73	LEPDR	BR	0	1	0	0	0	0	1	0	0	0	1	0	1	0	0	0	0	1	1	0	0	0	0	0	0	0	0	0	1	0	0	1	1	0	1	1	1	1	1	0	1	0	0	0	1	0	0
74	LEPLA	BR	0	1	0	0	0	0	1	0	0	0	1	0	1	0	0	0	1	0	1	0	0	0	0	0	0	0	0	0	1	0	0	1	0	1	1	0	1	1	0	1	0	0	0	0	1	0	0
75	LOBMA	BR	0	0	0	1	0	0	1	0	1	0	1	1	0	0	0	0	1	0	1	0	0	0	0	0	0	0	0	0	1	0	1	1	1	1	0	1	1	1	1	1	0	0	0	0	0	0	0
76	MATIN	BR	0	0	0	1	0	0	1	0	1	0	1	1	0	0	0	0	1	0	1	0	0	0	0	0	0	0	0	0	1	0	1	1	0	0	1	0	1	1	0	0	1	0	0	0	0	0	0
77	NASOF	BR	0	0	0	1	0	0	1	0	0	0	1	0	0	0	1	0	1	0	1	0	0	0	0	0	0	0	0	0	1	0	0	1	0	1	0	0	1	1	0	1	0	0	0	0	1	0	0
78	RAPRA	BR	0	0	1	0	0	0	1	0	0	0	1	0	0	1	0	0	0	1	1	0	0	0	0	0	0	0	0	0	1	0	0	1	1	0	1	1	1	1	1	0	0	0	0	1	1	0	0
79	RAPSA	BR	0	0	1	0	0	0	1	0	0	0	1	0	1	0	0	0	0	1	1	0	0	0	0	0	0	0	0	0	1	0	0	1	1	0	1	1	1	1	1	0	0	0	0	1	1	0	0
80	RAPRU	BR	0	0	1	0	0	0	1	0	0	0	1	0	0	1	0	0	1	0	1	0	0	0	0	0	0	0	0	0	1	0	0	1	1	0	1	1	1	1	1	1	0	0	0	0	1	0	0
81	RORDU	BR	1	0	0	0	0	0	1	0	0	0	1	0	0	0	0	1	1	0	1	0	0	0	0	0	0	0	0	0	1	0	0	1	0	1	1	0	1	1	0	1	0	0	0	0	0	0	0
82	RORPA	BR	0	0	0	0	1	0	1	0	0	0	1	0	0	1	0	0	1	0	1	0	0	0	0	0	0	0	0	0	1	0	0	1	0	1	1	0	1	1	0	1	0	0	0	0	0	0	0
83	SINAL	BR	1	0	0	0	0	0	1	0	0	0	1	0	0	0	0	1	1	0	1	0	0	0	0	0	0	0	0	0	1	0	1	1	0	1	1	0	1	1	0	0	1	0	0	0	1	0	0
84	SINAR	BR	1	0	0	0	0	0	1	0	0	0	1	0	0	0	0	1	1	0	1	0	0	0	0	0	0	0	0	0	1	0	1	1	1	0	1	1	1	1	1	0	1	0	0	0	1	0	0
85	SISAL	BR	0	0	1	0	0	0	1	0	0	0	1	0	0	1	0	0	1	0	1	0	0	0	0	0	0	0	0	0	1	0	1	1	0	0	1	0	1	1	0	1	0	0	0	0	1	0	1
86	SISIR	BR	1	0	0	0	0	0	1	0	0	0	1	0	0	0	0	1	1	0	1	0	0	0	0	0	0	0	0	0	1	0	0	1	1	0	0	1	1	0	0	1	0	0	0	0	1	0	0
87	SISOF	BR	1	0	0	0	0	0	1	0	0	0	1	0	0	0	0	1	1	0	1	0	0	0	0	0	0	0	0	0	1	0	0	1	1	0	0	1	1	0	0	1	0	0	0	0	1	0	0
88	SISOR	BR	1	0	0	0	0	0	1	0	0	0	1	0	0	0	0	1	1	0	1	0	0	0	0	0	0	0	0	0	1	0	0	1	0	0	1	0	1	1	0	1	0	0	0	0	0	0	0
89	THLAR	BR	1	0	0	0	0	0	1	0	0	0	1	0	0	0	0	1	1	0	1	0	0	0	0	0	0	0	0	0	1	0	1	1	0	1	1	0	1	1	0	0	1	0	0	0	1	0	0
90	CERGL	CA	1	0	0	0	0	0	1	0	0	0	1	0	0	0	0	1	1	0	1	0	0	1	0	0	0	0	0	0	0	0	1	0	0	0	1	0	0	1	0	1	0	0	0	0	0	0	0
91	HERCI	CA	1	0	0	0	0	0	1	0	0	0	1	0	0	0	0	1	1	0	1	0	0	1	0	0	0	0	0	0	0	0	1	1	0	0	1	0	1	1	0	1	0	0	0	0	0	0	0
92	POLTE	CA	1	0	0	0	0	0	1	0	0	0	1	0	0	0	0	1	1	0	1	0	0	1	0	0	0	0	0	0	0	0	1	0	0	0	1	0	0	1	0	1	0	0	0	0	0	0	0
93	SAPOF	CA	0	1	0	0	0	0	1	0	0	0	1	0	1	0	0	0	1	0	1	0	0	1	0	0	0	0	0	0	0	0	1	1	0	1	1	0	1	1	0	0	1	0	0	0	0	0	0
94	SCLAN	CA	1	0	0	0	0	0	1	0	0	0	1	0	0	0	0	1	1	0	1	0	0	1	0	0	0	0	0	0	0	0	1	0	0	0	1	0	0	1	0	1	0	0	0	0	0	0	0
95	SILGA	CA	1	0	0	0	0	0	1	0	0	0	1	0	0	0	0	1	1	0	1	0	0	1	0	0	0	0	0	0	0	0	1	0	0	0	1	0	0	1	0	1	0	0	0	0	0	0	0
96	SPEAR	CA	1	0	0	0	0	0	1	0	0	0	1	0	0	0	0	1	1	0	1	0	0	1	0	0	0	0	0	0	0	0	1	0	0	0	0	0	0	1	0	1	0	0	0	0	0	0	0
97	SPEBO	CA	0	0	1	0	0	0	1	0	0	0	1	0	0	1	0	0	1	0	1	0	0	1	0	0	0	0	0	0	0	0	1	0	0	1	1	0	0	1	0	1	0	0	0	0	0	0	0
98	STEGR	CA	0	1	0	0	0	0	1	0	0	0	1	0	0	1	0	0	1	0	1	0	0	1	0	0	0	0	0	0	0	0	1	0	0	0	1	0	0	1	0	1	0	0	0	0	0	0	0
99	STEMO	CA	0	1	0	0	0	0	1	0	0	0	1	0	0	1	0	0	1	0	1	0	0	1	0	0	0	0	0	0	0	0	1	0	0	0	0	0	0	1	0	1	0	0	0	0	0	0	0
100	TISVI	CA	0	1	0	0	0	0	1	0	0	0	1	0	0	1	0	0	1	0	1	0	0	1	0	0	0	0	0	0	0	0	1	0	0	0	0	0	0	1	0	1	0	0	0	0	0	0	0
101	CITLA	CU	1	0	0	0	0	0	0	1	0	0	1	0	0	0	0	1	0	1	0	1	0	0	0	0	1	0	0	0	0	0	0	1	0	0	1	0	1	1	0	0	0	0	0	1	1	0	0
102	CUCAN	CU	1	0	0	0	0	0	0	1	0	0	1	0	0	0	0	1	0	1	0	1	0	0	0	0	1	0	0	0	0	0	0	1	0	0	1	0	1	1	0	0	0	1	0	0	1	0	0
103	CUCDI	CU	1	0	0	0	0	0	0	1	0	0	1	0	0	0	0	1	0	1	0	1	0	0	0	0	1	0	0	0	0	0	0	1	0	0	1	0	1	1	0	0	0	0	0	1	1	0	0
104	CUCME	CU	1	0	0	0	0	0	0	1	0	0	1	0	0	0	0	1	0	1	0	1	0	0	0	0	1	0	0	0	0	0	1	1	0	0	1	0	1	1	0	0	0	0	0	1	1	0	0
105	CUCSA	CU	1	0	0	0	0	0	0	1	0	0	1	0	0	0	0	1	0	1	0	1	0	0	0	0	1	0	0	0	0	0	0	1	0	0	1	0	1	1	0	0	0	0	0	1	1	0	0
106	LAGSI	CU	1	0	0	0	0	0	0	1	0	0	1	0	0	0	0	1	0	1	0	1	0	0	0	0	1	0	0	0	0	0	0	1	0	0	1	0	1	1	0	0	0	0	0	1	1	1	0
107	LUFCY	CU	1	0	0	0	0	0	0	1	0	0	1	0	0	0	0	1	1	0	0	1	0	0	0	0	1	0	0	0	0	0	0	1	1	0	1	1	1	1	1	0	0	0	0	1	1	1	0
108	MOMBA	CU	1	0	0	0	0	0	0	1	0	0	1	0	0	0	0	1	0	1	0	1	0	0	0	0	1	0	0	0	0	0	0	1	0	0	1	0	1	1	0	0	0	0	0	1	0	0	0
109	MOMCH	CU	1	0	0	0	0	0	0	1	0	0	1	0	1	0	0	0	1	0	0	1	0	0	0	0	1	0	0	0	0	0	1	1	0	0	1	0	1	1	0	0	0	0	0	1	1	0	0
110	CYPAL	CY	0	1	0	0	0	0	1	0	0	1	0	0	0	0	1	0	0	1	1	0	1	0	0	0	0	0	0	0	0	0	1	1	0	1	1	0	1	1	0	1	0	0	0	0	0	0	0
111	CYPDI	CY	1	0	0	0	0	0	1	0	0	1	0	0	0	0	0	1	0	1	1	0	1	0	0	0	0	0	0	0	0	0	1	0	0	1	0	0	0	1	0	1	0	0	0	0	0	0	0
112	CYPES	CY	0	1	0	0	0	0	1	0	0	1	0	0	1	0	0	0	0	1	1	0	1	0	0	0	0	0	0	0	0	0	1	1	0	0	0	0	1	1	0	0	1	0	0	0	1	0	0
113	CYPIN	CY	0	1	0	0	0	0	1	0	0	1	0	0	1	0	0	0	0	1	1	0	1	0	0	0	0	0	0	0	0	0	1	1	0	0	0	0	1	1	0	1	0	0	0	0	0	0	0
114	CYPIR	CY	1	0	0	0	0	0	1	0	0	1	0	0	0	0	0	1	0	1	1	0	1	0	0	0	0	0	0	0	0	0	1	1	0	1	1	0	1	1	0	1	0	0	0	0	0	0	0
115	CYPOX	CY	0	1	0	0	0	0	1	0	0	1	0	0	0	1	0	0	0	1	1	0	1	0	0	0	0	0	0	0	0	0	1	1	0	1	1	0	1	1	0	0	1	0	0	0	0	0	0
116	CYPRO	CY	0	1	0	0	0	0	1	0	0	1	0	0	1	0	0	0	0	1	1	0	1	0	0	0	0	0	0	0	0	0	1	1	0	0	0	0	1	1	0	0	1	0	0	0	0	0	0
117	EUPLA	EU	0	0	1	0	0	0	1	0	0	0	1	0	0	1	0	0	1	0	1	0	0	1	0	0	0	0	0	0	0	0	1	1	0	0	0	0	1	1	0	0	0	0	1	0	0	0	0
118	EUPPE	EU	1	0	0	0	0	0	1	0	0	0	1	0	0	0	0	1	1	0	1	0	0	1	0	0	0	0	0	0	0	0	1	1	0	0	0	0	1	1	0	0	1	0	0	0	0	0	0
119	EUPTE	EU	0	0	0	1	0	0	1	0	1	0	1	1	0	0	0	0	1	0	1	0	0	1	0	0	0	0	0	0	0	0	1	1	0	1	0	0	1	1	0	0	1	0	0	0	0	0	0
120	ALYOV	FA	1	0	0	0	0	0	1	0	0	0	1	0	0	0	0	1	0	1	1	0	0	0	0	0	0	1	0	0	0	0	0	0	1	0	1	1	0	1	0	1	0	0	0	0	0	0	0
121	ALYVA	FA	0	0	0	1	0	0	1	0	0	0	1	0	0	1	0	0	0	1	1	0	0	0	0	0	0	0	1	0	0	0	0	0	1	0	0	1	0	0	0	1	0	0	0	0	0	0	0
122	CLITTE	FA	0	0	0	1	0	0	0	1	0	0	1	0	0	1	0	0	1	0	1	0	0	0	0	0	0	1	0	0	0	0	0	1	0	0	0	0	1	0	0	0	0	1	0	0	0	0	1
123	CRORE	FA	1	0	0	0	0	0	1	0	1	0	1	1	0	0	0	0	1	0	1	0	0	0	0	0	0	1	0	0	0	0	0	1	0	0	0	0	1	0	0	0	0	1	0	0	1	0	0
124	LABPU	FA	0	1	0	0	0	0	0	1	0	0	1	0	0	1	0	0	1	0	1	0	0	0	0	0	0	1	0	0	0	0	0	1	0	0	1	0	1	1	0	0	0	0	1	0	0	1	1
125	LATLA	FA	0	1	0	0	0	0	0	1	0	0	1	0	0	1	0	0	1	0	1	0	0	0	0	0	0	1	0	0	0	0	0	1	0	0	0	0	1	0	0	0	0	1	0	0	0	0	0
126	LATTI	FA	1	0	0	0	0	0	0	1	0	0	1	0	0	0	0	1	1	0	1	0	0	0	0	0	0	1	0	0	0	0	0	1	0	0	0	0	1	0	0	0	0	1	0	0	1	0	0
127	MEDLU	FA	0	0	0	1	0	0	1	0	0	0	1	0	0	1	0	0	1	0	1	0	0	0	0	0	0	1	0	0	0	0	0	1	1	0	1	1	1	1	1	0	1	0	0	0	0	0	1
128	MEDPO	FA	1	0	0	0	0	0	1	0	0	0	1	0	0	0	0	1	1	0	1	0	0	0	0	0	0	1	0	0	0	0	0	0	1	0	1	1	0	1	0	0	0	0	1	0	0	0	0
129	MEDSA	FA	0	1	0	0	0	0	1	0	0	0	1	1	0	0	0	0	1	0	1	0	0	0	0	0	0	1	0	0	0	0	0	1	1	0	0	1	1	0	0	0	1	0	0	0	1	0	0
130	MELAL	FA	0	0	1	0	0	0	1	0	0	0	1	0	0	1	0	0	1	0	1	0	0	0	0	0	0	1	0	0	0	0	1	1	0	1	1	0	1	1	0	0	1	0	0	0	0	0	1
131	MELIN	FA	1	0	0	0	0	0	1	0	0	0	1	0	0	0	0	1	1	0	1	0	0	0	0	0	0	1	0	0	0	0	1	1	0	1	1	0	1	1	0	0	1	0	0	0	1	0	1
132	MELOF	FA	0	0	1	0	0	0	1	0	0	0	1	0	0	1	0	0	1	0	1	0	0	0	0	0	0	1	0	0	0	0	1	1	0	0	0	0	1	1	0	0	0	1	0	0	0	0	0
133	PISSA	FA	1	0	0	0	0	0	0	1	0	0	1	0	0	0	0	1	1	0	1	0	0	0	0	0	0	1	0	0	0	0	0	1	1	0	0	1	1	0	0	0	0	0	1	0	1	0	0
134	PUEPH	FA	0	1	0	0	0	0	0	1	0	0	1	0	0	1	0	0	1	0	1	0	0	0	0	0	0	1	0	0	0	0	1	1	0	0	1	0	1	1	0	0	0	1	0	0	0	0	1
135	SECVA	FA	0	1	0	0	0	0	1	0	0	0	1	0	0	1	0	0	0	1	1	0	0	0	0	0	0	1	0	0	0	0	0	1	1	0	1	1	1	1	1	0	0	1	0	0	0	0	1
136	TRIDU	FA	1	0	0	0	0	0	1	0	0	0	1	0	0	0	0	1	0	1	1	0	0	0	0	0	0	1	0	0	0	0	0	0	0	1	1	0	0	1	0	1	0	0	0	0	0	0	0
137	TRIPR	FA	0	1	0	0	0	0	1	0	0	0	1	0	0	1	0	0	0	1	1	0	0	0	0	0	0	1	0	0	0	0	0	0	0	1	1	0	0	1	0	1	0	0	0	0	0	0	0
138	TRIRE	FA	0	1	0	0	0	0	1	0	0	0	1	0	0	1	0	0	1	0	1	0	0	0	0	0	0	1	0	0	0	0	0	1	1	0	0	1	1	0	0	1	0	0	0	0	0	0	0
139	VICFA	FA	1	0	0	0	0	0	0	1	0	0	1	0	0	0	0	1	1	0	1	0	0	0	0	0	0	1	0	0	0	0	0	1	1	0	1	1	1	1	1	0	0	0	1	0	1	0	0
140	VICSA	FA	1	0	0	0	0	0	0	1	0	0	1	0	0	0	0	1	1	0	1	0	0	0	0	0	0	1	0	0	0	0	0	1	1	0	1	1	1	1	1	0	0	1	0	0	0	0	0
141	VIGUN	FA	1	0	0	0	0	0	0	1	0	0	1	0	0	0	0	1	1	0	1	0	0	0	0	0	0	1	0	0	0	0	0	1	0	0	0	0	1	0	0	0	0	0	1	0	1	0	0
142	PLALA	PL	0	0	0	1	0	0	1	0	0	0	1	0	1	0	0	0	1	0	1	0	0	0	0	0	0	0	0	1	0	0	1	1	0	1	0	0	1	1	0	0	1	0	0	0	1	0	0
143	PLAMA	PL	0	0	0	1	0	0	1	0	0	0	1	0	0	1	0	0	1	0	1	0	0	0	0	0	0	0	0	1	0	0	1	1	0	1	0	0	1	1	0	1	0	0	0	0	1	0	0
144	PLAOV	PL	1	0	0	0	0	0	1	0	0	0	1	0	0	0	0	1	1	0	1	0	0	0	0	0	0	0	0	1	0	0	1	1	0	0	1	0	1	1	0	0	1	0	0	0	0	0	0
145	AEGCY	PA	1	0	0	0	0	0	1	0	0	1	0	0	0	0	0	1	0	1	1	0	0	0	1	0	0	0	0	0	0	0	1	0	0	1	1	0	0	1	0	0	0	1	0	0	0	0	0
146	AIRCA	PA	1	0	0	0	0	0	1	0	0	1	0	0	0	0	0	1	0	1	1	0	0	0	1	0	0	0	0	0	0	0	1	0	0	1	1	0	0	1	0	1	0	0	0	0	0	0	0
147	ANTOD	PA	0	1	0	0	0	0	1	0	0	1	0	0	0	1	0	0	0	1	1	0	0	0	1	0	0	0	0	0	0	0	1	0	0	0	0	0	0	1	0	0	1	0	0	0	0	0	0
148	ARTHI	PA	1	0	0	0	0	0	1	0	0	1	0	0	0	0	0	1	0	1	1	0	0	0	1	0	0	0	0	0	0	0	1	1	0	0	0	0	1	1	0	0	1	0	0	0	0	0	0
149	AVEBA	PA	1	0	0	0	0	0	1	0	0	1	0	0	0	0	0	1	0	1	1	0	0	0	1	0	0	0	0	0	0	0	1	0	0	0	1	0	0	1	0	0	0	1	0	0	0	0	0
150	AVEFA	PA	1	0	0	0	0	0	1	0	0	1	0	0	0	0	0	1	0	1	1	0	0	0	1	0	0	0	0	0	0	0	1	0	0	0	1	0	0	1	0	0	0	0	1	0	1	0	0
151	AVESA	PA	1	0	0	0	0	0	1	0	0	1	0	0	0	0	0	1	0	1	1	0	0	0	1	0	0	0	0	0	0	0	1	0	0	0	0	0	0	1	0	0	0	0	1	0	1	0	0
152	BOTIS	PA	0	1	0	0	0	0	1	0	0	1	0	0	1	0	0	0	0	1	1	0	0	0	1	0	0	0	0	0	0	0	1	1	0	0	1	0	1	1	0	0	0	0	1	0	0	0	1
153	BOTPE	PA	0	1	0	0	0	0	1	0	0	1	0	0	0	1	0	0	0	1	1	0	0	0	1	0	0	0	0	0	0	0	1	1	0	0	0	0	1	1	0	0	0	1	0	0	0	0	1
154	BRADI	PA	0	0	0	1	0	0	1	0	0	1	0	0	0	1	0	0	0	1	1	0	0	0	1	0	0	0	0	0	0	0	1	0	0	0	1	0	0	1	0	0	1	0	0	0	0	0	1
155	BRAMU	PA	0	1	0	0	0	0	1	0	0	1	0	0	0	1	0	0	0	1	1	0	0	0	1	0	0	0	0	0	0	0	1	1	0	1	1	0	1	1	0	0	1	0	0	0	0	0	0
156	BRARE	PA	0	0	0	1	0	0	1	0	0	1	0	0	0	1	0	0	0	1	1	0	0	0	1	0	0	0	0	0	0	0	1	1	0	0	0	0	1	1	0	0	1	0	0	0	0	0	0
157	BRIMI	PA	1	0	0	0	0	0	1	0	0	1	0	0	0	0	0	1	0	1	1	0	0	0	1	0	0	0	0	0	0	0	1	0	0	0	1	0	0	1	0	1	0	0	0	0	0	0	0
158	BROCA	PA	0	0	0	0	1	0	1	0	0	1	0	0	0	1	0	0	0	1	1	0	0	0	1	0	0	0	0	0	0	0	1	1	0	0	0	0	1	1	0	0	0	0	1	0	0	0	0
159	BRODI	PA	1	0	0	0	0	0	1	0	0	1	0	0	0	0	0	1	0	1	1	0	0	0	1	0	0	0	0	0	0	0	1	0	0	1	1	0	0	1	0	0	0	0	1	0	1	0	0
160	BROHO	PA	0	0	1	0	0	0	1	0	0	1	0	0	1	0	0	0	0	1	1	0	0	0	1	0	0	0	0	0	0	0	1	1	0	0	1	0	1	1	0	0	0	1	0	0	0	0	1
161	BROIN	PA	0	1	0	0	0	0	1	0	0	1	0	0	1	0	0	0	0	1	1	0	0	0	1	0	0	0	0	0	0	0	1	1	0	0	1	0	1	1	0	0	0	0	1	0	1	0	1
162	BROJA	PA	1	0	0	0	0	0	1	0	0	1	0	0	0	0	0	1	0	1	1	0	0	0	1	0	0	0	0	0	0	0	1	0	0	0	1	0	0	1	0	0	0	1	0	0	1	0	0
163	BROMA	PA	1	0	0	0	0	0	1	0	0	1	0	0	0	0	0	1	0	1	1	0	0	0	1	0	0	0	0	0	0	0	1	1	0	0	1	0	1	1	0	0	0	0	1	0	1	0	0
164	BRORI	PA	1	0	0	0	0	0	1	0	0	1	0	0	0	0	0	1	0	1	1	0	0	0	1	0	0	0	0	0	0	0	1	0	0	0	1	0	0	1	0	0	0	0	1	0	1	0	0
165	BRORU	PA	1	0	0	0	0	0	1	0	0	1	0	0	0	0	0	1	0	1	1	0	0	0	1	0	0	0	0	0	0	0	1	0	0	0	0	0	0	1	0	0	0	0	1	0	0	0	1
166	BROSE	PA	1	0	0	0	0	0	1	0	0	1	0	0	0	0	0	1	0	1	1	0	0	0	1	0	0	0	0	0	0	0	1	0	0	0	1	0	0	1	0	0	0	1	0	0	1	0	0
167	BROTE	PA	1	0	0	0	0	0	1	0	0	1	0	0	0	0	0	1	0	1	1	0	0	0	1	0	0	0	0	0	0	0	1	0	0	0	1	0	0	1	0	0	0	0	1	0	1	0	0
168	CENCI	PA	0	1	0	0	0	0	1	0	0	1	0	0	1	0	0	0	0	1	1	0	0	0	1	0	0	0	0	0	0	0	1	1	0	0	1	0	1	1	0	0	1	0	0	0	0	0	1
169	CHLGA	PA	0	1	0	0	0	0	1	0	0	1	0	0	0	1	0	0	0	1	1	0	0	0	1	0	0	0	0	0	0	0	1	1	0	0	1	0	1	1	0	1	0	0	0	0	0	0	1
170	CHRZI	PA	0	1	0	0	0	0	1	0	0	1	0	0	0	1	0	0	0	1	1	0	0	0	1	0	0	0	0	0	0	0	1	1	0	0	1	0	1	1	0	0	0	1	0	0	0	0	1
171	COILA	PA	0	0	0	1	0	0	1	0	0	1	0	0	0	1	0	0	0	1	1	0	0	0	1	0	0	0	0	0	0	0	0	0	1	0	0	1	0	0	0	0	0	0	1	0	1	1	0
172	CORSE	PA	0	1	0	0	0	0	1	0	0	1	0	0	0	1	0	0	0	1	1	0	0	0	1	0	0	0	0	0	0	0	1	1	0	0	1	0	1	1	0	0	0	0	1	0	0	0	1
173	CRYVA	PA	1	0	0	0	0	0	1	0	0	1	0	0	0	0	0	1	0	1	1	0	0	0	1	0	0	0	0	0	0	0	1	0	0	1	1	0	0	1	0	0	1	0	0	0	0	0	0
174	CYMCI	PA	0	1	0	0	0	0	1	0	0	1	0	0	1	0	0	0	0	1	1	0	0	0	1	0	0	0	0	0	0	0	0	1	0	0	0	0	1	0	0	0	1	0	0	0	1	0	1
175	CYNDA	PA	0	1	0	0	0	0	1	0	0	1	0	0	1	0	0	0	0	1	1	0	0	0	1	0	0	0	0	0	0	0	1	1	0	0	0	0	1	1	0	1	0	0	0	0	0	0	1
176	CYNNL	PA	0	1	0	0	0	0	1	0	0	1	0	0	0	1	0	0	0	1	1	0	0	0	1	0	0	0	0	0	0	0	1	1	0	0	1	0	1	1	0	0	1	0	0	0	0	0	0
177	CYNPL	PA	0	1	0	0	0	0	1	0	0	1	0	0	0	1	0	0	0	1	1	0	0	0	1	0	0	0	0	0	0	0	1	1	0	0	1	0	1	1	0	0	1	0	0	0	0	0	1
178	CYRTR	PA	0	1	0	0	0	0	1	0	0	1	0	0	0	1	0	0	0	1	1	0	0	0	1	0	0	0	0	0	0	0	1	1	0	1	1	0	1	1	0	1	0	0	0	0	0	0	0
179	DACGL	PA	0	1	0	0	0	0	1	0	0	1	0	0	1	0	0	0	0	1	1	0	0	0	1	0	0	0	0	0	0	0	1	1	0	0	1	0	1	1	0	0	0	1	0	0	0	0	0
180	DACAE	PA	0	0	0	1	0	0	1	0	0	1	0	0	0	1	0	0	0	1	1	0	0	0	1	0	0	0	0	0	0	0	1	1	0	0	1	0	1	1	0	1	0	0	0	0	1	0	1
181	DICAN	PA	0	1	0	0	0	0	1	0	0	1	0	0	0	1	0	0	0	1	1	0	0	0	1	0	0	0	0	0	0	0	1	1	0	0	1	0	1	1	0	0	1	0	0	0	0	0	0
182	DICAR	PA	0	1	0	0	0	0	1	0	0	1	0	0	0	1	0	0	0	1	1	0	0	0	1	0	0	0	0	0	0	0	1	1	0	0	1	0	1	1	0	0	1	0	0	0	0	0	0
183	DIGBI	PA	0	1	0	0	0	0	1	0	0	1	0	0	0	1	0	0	0	1	1	0	0	0	1	0	0	0	0	0	0	0	1	1	0	0	1	0	1	1	0	0	1	0	0	0	0	0	0
184	DIGIS	PA	1	0	0	0	0	0	1	0	0	1	0	0	0	0	0	1	0	1	1	0	0	0	1	0	0	0	0	0	0	0	1	1	0	0	1	0	1	1	0	0	1	0	0	0	0	0	0
185	DIGNU	PA	1	0	0	0	0	0	1	0	0	1	0	0	0	0	0	1	0	1	1	0	0	0	1	0	0	0	0	0	0	0	1	1	0	0	0	0	1	1	0	0	1	0	0	0	0	0	0
186	DIGER	PA	0	1	0	0	0	0	1	0	0	1	0	0	1	0	0	0	0	1	1	0	0	0	1	0	0	0	0	0	0	0	1	1	0	0	1	0	1	1	0	0	1	0	0	0	0	0	1
187	DIGSA	PA	1	0	0	0	0	0	1	0	0	1	0	0	0	0	0	1	0	1	1	0	0	0	1	0	0	0	0	0	0	0	1	1	0	0	1	0	1	1	0	0	1	0	0	0	0	0	1
188	DIGSE	PA	0	1	0	0	0	0	1	0	0	1	0	0	0	1	0	0	0	1	1	0	0	0	1	0	0	0	0	0	0	0	1	1	0	0	1	0	1	1	0	0	1	0	0	0	1	0	0
189	DIGTE	PA	1	0	0	0	0	0	1	0	0	1	0	0	0	0	0	1	0	1	1	0	0	0	1	0	0	0	0	0	0	0	1	1	0	0	1	0	1	1	0	0	1	0	0	0	0	0	0
190	DIGVE	PA	0	1	0	0	0	0	1	0	0	1	0	0	0	1	0	0	0	1	1	0	0	0	1	0	0	0	0	0	0	0	1	1	0	0	0	0	1	1	0	0	1	0	0	0	0	0	0
191	ECHCR	PA	1	0	0	0	0	0	1	0	0	1	0	0	0	0	0	1	0	1	1	0	0	0	1	0	0	0	0	0	0	0	1	0	0	1	1	0	0	1	0	0	1	0	0	0	0	0	0
192	ECHPY	PA	0	1	0	0	0	0	1	0	0	1	0	0	1	0	0	0	0	1	1	0	0	0	1	0	0	0	0	0	0	0	1	1	0	1	1	0	1	1	0	1	0	0	0	0	0	0	1
193	ELECO	PA	1	0	0	0	0	0	1	0	0	1	0	0	0	0	0	1	0	1	1	0	0	0	1	0	0	0	0	0	0	0	1	0	0	0	1	0	0	1	0	0	1	0	0	0	1	1	1
194	ELEIN	PA	1	0	0	0	0	0	1	0	0	1	0	0	0	0	0	1	0	1	1	0	0	0	1	0	0	0	0	0	0	0	1	0	0	0	1	0	0	1	0	1	0	0	0	0	1	0	0
195	ELEMU	PA	1	0	0	0	0	0	1	0	0	1	0	0	0	0	0	1	0	1	1	0	0	0	1	0	0	0	0	0	0	0	1	0	0	0	1	0	0	1	0	1	0	0	0	0	0	0	0
196	ELYRE	PA	0	1	0	0	0	0	1	0	0	1	0	0	1	0	0	0	0	1	1	0	0	0	1	0	0	0	0	0	0	0	1	1	0	0	1	0	1	1	0	0	0	1	0	0	1	0	0
197	ERATR	PA	0	1	0	0	0	0	1	0	0	1	0	0	0	1	0	0	0	1	1	0	0	0	1	0	0	0	0	0	0	0	1	1	0	1	1	0	1	1	0	1	0	0	0	0	0	0	0
198	ERBAR	PA	1	0	0	0	0	0	1	0	0	1	0	0	0	0	0	1	0	1	1	0	0	0	1	0	0	0	0	0	0	0	1	0	0	0	1	0	0	1	0	1	0	0	0	0	1	0	0
199	ERCIL	PA	1	0	0	0	0	0	1	0	0	1	0	0	0	0	0	1	0	1	1	0	0	0	1	0	0	0	0	0	0	0	1	0	0	0	1	0	0	1	0	1	0	0	0	0	0	0	0
200	ERCUR	PA	0	1	0	0	0	0	1	0	0	1	0	0	0	1	0	0	0	1	1	0	0	0	1	0	0	0	0	0	0	0	1	0	0	0	1	0	0	1	0	1	0	0	0	0	0	0	1
201	ERIEH	PA	0	1	0	0	0	0	1	0	0	1	0	0	0	1	0	0	0	1	1	0	0	0	1	0	0	0	0	0	0	0	1	0	0	0	1	0	0	1	0	1	0	0	0	0	1	0	1
202	ERPIL	PA	1	0	0	0	0	0	1	0	0	1	0	0	0	0	0	1	0	1	1	0	0	0	1	0	0	0	0	0	0	0	1	0	0	0	0	0	0	1	0	1	0	0	0	0	1	0	0
203	ERSUP	PA	0	1	0	0	0	0	1	0	0	1	0	0	0	1	0	0	0	1	1	0	0	0	1	0	0	0	0	0	0	0	1	1	0	0	1	0	1	1	0	1	0	0	0	0	0	0	0
204	ERVIS	PA	1	0	0	0	0	0	1	0	0	1	0	0	0	0	0	1	0	1	1	0	0	0	1	0	0	0	0	0	0	0	1	1	0	0	1	0	1	1	0	1	0	0	0	0	0	0	0
205	EUCCO	PA	1	0	0	0	0	0	1	0	0	1	0	0	0	0	0	1	0	1	1	0	0	0	1	0	0	0	0	0	0	0	1	1	0	0	1	0	1	1	0	0	1	0	0	0	0	0	0
206	FESAR	PA	0	1	0	0	0	0	1	0	0	1	0	0	1	0	0	0	0	1	1	0	0	0	1	0	0	0	0	0	0	0	1	1	0	1	1	0	1	1	0	0	1	0	0	0	0	0	1
207	FESOV	PA	0	1	0	0	0	0	1	0	0	1	0	0	0	1	0	0	0	1	1	0	0	0	1	0	0	0	0	0	0	0	1	0	0	0	1	0	0	1	0	0	0	1	0	0	0	0	0
208	GASVE	PA	1	0	0	0	0	0	1	0	0	1	0	0	0	0	0	1	0	1	1	0	0	0	1	0	0	0	0	0	0	0	1	1	0	1	0	0	1	1	0	1	0	0	0	0	0	0	0
209	GLYFL	PA	0	1	0	0	0	0	1	0	0	1	0	0	0	1	0	0	0	1	1	0	0	0	1	0	0	0	0	0	0	0	1	1	0	1	0	0	1	1	0	0	1	0	0	0	1	0	0
210	HACGR	PA	1	0	0	0	0	0	1	0	0	1	0	0	0	0	0	1	0	1	1	0	0	0	1	0	0	0	0	0	0	0	1	1	0	0	1	0	1	1	0	1	0	0	0	0	0	0	0
211	HAICY	PA	1	0	0	0	0	0	1	0	0	1	0	0	0	0	0	1	0	1	1	0	0	0	1	0	0	0	0	0	0	0	1	0	0	1	1	0	0	1	0	1	0	0	0	0	1	0	0
212	HEMAL	PA	0	1	0	0	0	0	1	0	0	1	0	0	0	0	1	0	0	1	1	0	0	0	1	0	0	0	0	0	0	0	1	1	0	1	1	0	1	1	0	1	0	0	0	0	0	0	0
213	HOLAN	PA	0	1	0	0	0	0	1	0	0	1	0	0	0	1	0	0	0	1	1	0	0	0	1	0	0	0	0	0	0	0	1	1	0	1	1	0	1	1	0	0	1	0	0	0	0	0	0
214	HOMAR	PA	1	0	0	0	0	0	1	0	0	1	0	0	0	0	0	1	0	1	1	0	0	0	1	0	0	0	0	0	0	0	1	1	0	1	1	0	1	1	0	0	0	0	1	0	0	0	0
215	HOMUR	PA	1	0	0	0	0	0	1	0	0	1	0	0	0	0	0	1	0	1	1	0	0	0	1	0	0	0	0	0	0	0	1	1	0	1	1	0	1	1	0	0	0	1	0	0	0	0	0
216	HOVUL	PA	1	0	0	0	0	0	1	0	0	1	0	0	0	0	0	1	0	1	1	0	0	0	1	0	0	0	0	0	0	0	1	1	0	0	1	0	1	1	0	0	0	0	1	0	1	0	1
217	HYHIR	PA	0	1	0	0	0	0	1	0	0	1	0	0	1	0	0	0	0	1	1	0	0	0	1	0	0	0	0	0	0	0	1	1	0	0	1	0	1	1	0	0	0	1	0	0	0	0	1
218	HYRUF	PA	0	0	0	1	0	0	1	0	0	1	0	0	1	0	0	0	0	1	1	0	0	0	1	0	0	0	0	0	0	0	1	1	0	0	1	0	1	1	0	0	0	1	0	0	0	0	0
219	HYPDI	PA	0	1	0	0	0	0	1	0	0	1	0	0	0	1	0	0	0	1	1	0	0	0	1	0	0	0	0	0	0	0	1	1	0	0	0	0	1	1	0	0	0	0	1	0	1	0	0
220	ISCRU	PA	0	0	0	1	0	0	1	0	0	1	0	0	0	1	0	0	0	1	1	0	0	0	1	0	0	0	0	0	0	0	1	0	0	0	1	0	0	1	0	0	0	1	0	0	0	0	0
221	LAMAU	PA	1	0	0	0	0	0	1	0	0	1	0	0	0	0	0	1	0	1	1	0	0	0	1	0	0	0	0	0	0	0	1	0	0	0	1	0	0	1	0	0	1	0	0	0	0	0	0
222	LOLMU	PA	0	0	0	0	1	0	1	0	0	1	0	0	0	1	0	0	0	1	1	0	0	0	1	0	0	0	0	0	0	0	1	1	0	1	1	0	1	1	0	0	0	1	0	0	0	0	1
223	LOLPE	PA	0	1	0	0	0	0	1	0	0	1	0	0	0	1	0	0	0	1	1	0	0	0	1	0	0	0	0	0	0	0	1	1	0	0	1	0	1	1	0	0	1	0	0	0	0	0	1
224	LOLTE	PA	1	0	0	0	0	0	1	0	0	1	0	0	0	0	0	1	0	1	1	0	0	0	1	0	0	0	0	0	0	0	1	1	0	0	1	0	1	1	0	0	0	1	0	0	0	0	0
225	MEGMA	PA	0	1	0	0	0	0	1	0	0	1	0	0	1	0	0	0	0	1	1	0	0	0	1	0	0	0	0	0	0	0	1	1	0	1	1	0	1	1	0	0	0	1	0	0	0	0	0
226	MELMI	PA	0	1	0	0	0	0	1	0	0	1	0	0	0	1	0	0	0	1	1	0	0	0	1	0	0	0	0	0	0	0	1	1	0	0	1	0	1	1	0	0	1	0	0	0	0	0	0
227	MELRE	PA	0	0	0	1	0	0	1	0	0	1	0	0	0	1	0	0	0	1	1	0	0	0	1	0	0	0	0	0	0	0	1	1	0	0	1	0	1	1	0	0	1	0	0	0	0	0	1
228	MISIN	PA	0	1	0	0	0	0	1	0	0	1	0	0	1	0	0	0	0	1	1	0	0	0	1	0	0	0	0	0	0	0	1	1	0	0	1	0	1	1	0	0	1	0	0	0	0	0	0
229	PANAN	PA	0	1	0	0	0	0	1	0	0	1	0	0	1	0	0	0	0	1	1	0	0	0	1	0	0	0	0	0	0	0	1	1	0	0	1	0	1	1	0	0	1	0	0	0	0	0	1
230	PANMI	PA	1	0	0	0	0	0	1	0	0	1	0	0	0	0	0	1	0	1	1	0	0	0	1	0	0	0	0	0	0	0	1	0	0	0	1	0	0	1	0	0	0	1	0	0	0	0	0
231	PARIN	PA	1	0	0	0	0	0	1	0	0	1	0	0	0	0	0	1	0	1	1	0	0	0	1	0	0	0	0	0	0	0	1	0	0	1	1	0	0	1	0	0	0	1	0	0	0	0	0
232	PENCL	PA	0	1	0	0	0	0	1	0	0	1	0	0	1	0	0	0	0	1	1	0	0	0	1	0	0	0	0	0	0	0	0	1	0	0	0	0	1	0	0	0	1	0	0	0	0	0	1
233	PENGL	PA	1	0	0	0	0	0	1	0	0	1	0	0	0	0	0	1	0	1	1	0	0	0	1	0	0	0	0	0	0	0	1	1	0	0	1	0	1	1	0	0	0	1	0	0	0	0	0
234	PENPU	PA	0	1	0	0	0	0	1	0	0	1	0	0	0	1	0	0	0	1	1	0	0	0	1	0	0	0	0	0	0	0	1	1	0	0	1	0	1	1	0	0	1	0	0	0	0	0	1
235	PENSE	PA	0	0	0	1	0	0	1	0	0	1	0	1	0	0	0	0	0	1	1	0	0	0	1	0	0	0	0	0	0	0	1	1	0	1	1	0	1	1	0	0	0	1	0	0	0	0	1
236	PENVI	PA	0	1	0	0	0	0	1	0	0	1	0	0	1	0	0	0	0	1	1	0	0	0	1	0	0	0	0	0	0	0	1	1	0	0	0	0	1	1	0	0	0	0	1	0	0	0	0
237	PHABR	PA	1	0	0	0	0	0	1	0	0	1	0	0	0	0	0	1	0	1	1	0	0	0	1	0	0	0	0	0	0	0	1	0	0	0	1	0	0	1	0	0	0	1	0	0	0	0	0
238	PHACA	PA	1	0	0	0	0	0	1	0	0	1	0	0	0	0	0	1	0	1	1	0	0	0	1	0	0	0	0	0	0	0	1	0	0	0	1	0	0	1	0	0	0	1	0	0	0	0	0
239	PHAMI	PA	1	0	0	0	0	0	1	0	0	1	0	0	0	0	0	1	0	1	1	0	0	0	1	0	0	0	0	0	0	0	1	0	0	0	1	0	0	1	0	0	1	0	0	0	1	0	0
240	PHAPA	PA	1	0	0	0	0	0	1	0	0	1	0	0	0	0	0	1	0	1	1	0	0	0	1	0	0	0	0	0	0	0	1	0	0	0	1	0	0	1	0	0	1	0	0	0	0	0	0
241	PHLPR	PA	0	1	0	0	0	0	1	0	0	1	0	0	0	1	0	0	0	1	1	0	0	0	1	0	0	0	0	0	0	0	1	1	0	0	1	0	1	1	0	1	0	0	0	0	0	0	0
242	POAAN	PA	1	0	0	0	0	0	1	0	0	1	0	0	0	0	0	1	0	1	1	0	0	0	1	0	0	0	0	0	0	0	1	1	0	0	0	0	1	1	0	0	1	0	0	0	0	0	0
243	POACO	PA	0	1	0	0	0	0	1	0	0	1	0	0	1	0	0	0	0	1	1	0	0	0	1	0	0	0	0	0	0	0	1	1	0	0	1	0	1	1	0	0	1	0	0	0	0	0	1
244	POANE	PA	0	1	0	0	0	0	1	0	0	1	0	0	0	1	0	0	0	1	1	0	0	0	1	0	0	0	0	0	0	0	1	1	0	0	0	0	1	1	0	0	1	0	0	0	0	0	0
245	POAPR	PA	0	1	0	0	0	0	1	0	0	1	0	0	1	0	0	0	0	1	1	0	0	0	1	0	0	0	0	0	0	0	1	1	0	0	1	0	1	1	0	0	1	0	0	0	0	0	1
246	POLYM	PA	1	0	0	0	0	0	1	0	0	1	0	0	0	0	0	1	0	1	1	0	0	0	1	0	0	0	0	0	0	0	1	1	0	0	1	0	1	1	0	1	0	0	0	0	0	0	0
247	POLYV	PA	0	1	0	0	0	0	1	0	0	1	0	0	0	1	0	0	0	1	1	0	0	0	1	0	0	0	0	0	0	0	1	1	0	1	1	0	1	1	0	1	0	0	0	0	0	0	0
248	ROTCO	PA	1	0	0	0	0	0	1	0	0	1	0	0	0	0	0	1	0	1	1	0	0	0	1	0	0	0	0	0	0	0	1	1	0	1	1	0	1	1	0	0	0	0	1	0	0	0	1
249	SACOF	PA	0	1	0	0	0	0	1	0	0	1	0	0	0	1	0	0	0	1	1	0	0	0	1	0	0	0	0	0	0	0	1	1	0	0	1	0	1	1	0	0	1	0	0	0	1	0	1
250	SACVI	PA	0	1	0	0	0	0	1	0	0	1	0	0	0	1	0	0	0	1	1	0	0	0	1	0	0	0	0	0	0	0	1	1	0	0	1	0	1	1	0	0	1	0	0	0	0	0	0
251	SCHBA	PA	1	0	0	0	0	0	1	0	0	1	0	0	0	0	0	1	0	1	1	0	0	0	1	0	0	0	0	0	0	0	1	1	0	0	0	0	1	1	0	1	0	0	0	0	0	0	0
252	SECCE	PA	0	0	1	0	0	0	1	0	0	1	0	0	0	1	0	0	0	1	1	0	0	0	1	0	0	0	0	0	0	0	1	1	0	0	1	0	1	1	0	0	0	0	1	0	1	0	0
253	SETSP	PA	0	1	0	0	0	0	1	0	0	1	0	0	1	0	0	0	0	1	1	0	0	0	1	0	0	0	0	0	0	0	1	1	0	0	1	0	1	1	0	0	1	0	0	0	0	0	1
254	SETVI	PA	1	0	0	0	0	0	1	0	0	1	0	0	0	0	0	1	0	1	1	0	0	0	1	0	0	0	0	0	0	0	1	1	0	0	1	0	1	1	0	0	1	0	0	0	0	0	0
255	SORAR	PA	0	0	0	1	0	0	1	0	0	1	0	0	0	1	0	0	0	1	1	0	0	0	1	0	0	0	0	0	0	0	1	1	0	0	1	0	1	1	0	0	1	0	0	0	1	0	0
256	SORBI	PA	1	0	0	0	0	0	1	0	0	1	0	0	0	0	0	1	0	1	1	0	0	0	1	0	0	0	0	0	0	0	1	0	0	1	1	0	0	1	0	0	1	0	0	0	1	0	0
257	SORHA	PA	0	1	0	0	0	0	1	0	0	1	0	0	1	0	0	0	0	1	1	0	0	0	1	0	0	0	0	0	0	0	1	1	0	0	1	0	1	1	0	0	1	0	0	0	1	0	0
258	SORAL	PA	0	1	0	0	0	0	1	0	0	1	0	0	1	0	0	0	0	1	1	0	0	0	1	0	0	0	0	0	0	0	1	1	0	0	1	0	1	1	0	0	0	1	0	0	0	0	0
259	TRABE	PA	1	0	0	0	0	0	1	0	0	1	0	0	0	0	0	1	0	1	1	0	0	0	1	0	0	0	0	0	0	0	1	1	0	0	1	0	1	1	0	0	1	0	0	0	0	0	0
260	UROPA	PA	1	0	0	0	0	0	1	0	0	1	0	0	0	0	0	1	0	1	1	0	0	0	1	0	0	0	0	0	0	0	1	1	0	0	1	0	1	1	1	0	1	0	0	0	0	0	0
261	VULBR	PA	1	0	0	0	0	0	1	0	0	1	0	0	0	0	0	1	0	1	1	0	0	0	1	0	0	0	0	0	0	0	1	1	0	1	1	0	1	1	0	0	0	1	0	0	0	0	0
262	VULMY	PA	1	0	0	0	0	0	1	0	0	1	0	0	0	0	0	1	0	1	1	0	0	0	1	0	0	0	0	0	0	0	1	1	0	0	1	0	1	1	0	0	0	1	0	0	0	0	1
263	ZOYMA	PA	0	0	0	1	0	0	1	0	0	1	0	0	1	0	0	0	0	1	1	0	0	0	1	0	0	0	0	0	0	0	1	1	0	1	1	0	1	1	0	0	1	0	0	0	0	0	1
264	FAGES	PO	1	0	0	0	0	0	1	0	0	0	1	0	0	0	0	1	0	1	1	0	1	0	0	0	0	0	0	0	0	0	1	0	0	0	1	0	0	1	0	0	0	0	1	0	1	0	0
265	FALCO	PO	0	0	1	0	0	0	0	1	0	0	1	0	0	1	0	0	0	1	1	0	1	0	0	0	0	0	0	0	0	0	1	0	0	1	1	0	0	1	0	0	0	1	0	0	1	0	0
266	MUECO	PO	0	1	0	0	0	0	0	0	1	0	1	0	0	1	0	0	0	1	1	0	1	0	0	0	0	0	0	0	0	0	1	0	0	0	1	0	0	1	0	0	0	1	0	0	0	0	0
267	PERHY	PO	1	0	0	0	0	0	1	0	0	0	1	0	0	0	0	1	0	1	1	0	1	0	0	0	0	0	0	0	0	0	1	0	0	1	1	0	0	1	0	0	1	0	0	0	1	0	0
268	PERLA	PO	1	0	0	0	0	0	1	0	0	0	1	0	0	0	0	1	0	1	1	0	1	0	0	0	0	0	0	0	0	0	1	0	0	1	0	0	0	1	0	0	1	0	0	0	0	0	0
269	PERMA	PO	1	0	0	0	0	0	1	0	0	0	1	0	0	0	0	1	0	1	1	0	1	0	0	0	0	0	0	0	0	0	1	1	0	0	0	0	0	1	0	0	1	0	0	0	1	0	0
270	POLAR	PO	1	0	0	0	0	0	1	0	0	0	1	0	0	0	0	1	0	1	1	0	1	0	0	0	0	0	0	0	0	0	1	0	0	0	1	0	0	1	0	0	1	0	0	0	0	0	0
271	POLRG	PO	1	0	0	0	0	0	1	0	0	0	1	0	0	0	0	1	0	1	1	0	1	0	0	0	0	0	0	0	0	0	1	0	0	0	1	0	0	1	0	0	1	0	0	0	0	0	0
272	POLAV	PO	1	0	0	0	0	0	1	0	0	0	1	0	0	0	0	1	0	1	1	0	1	0	0	0	0	0	0	0	0	0	1	0	0	0	1	0	0	1	0	0	1	0	0	0	1	0	0
273	RUMAC	PO	0	1	0	0	0	0	1	0	0	0	1	0	1	0	0	0	0	1	1	0	1	0	0	0	0	0	0	0	0	0	1	1	0	0	1	0	1	1	0	1	0	0	0	0	1	0	0
274	RUMCO	PO	0	0	0	0	1	0	1	0	0	0	1	0	0	1	0	0	0	1	1	0	1	0	0	0	0	0	0	0	0	0	1	0	0	1	1	0	0	1	0	0	1	0	0	0	1	0	0
275	RUMCR	PO	0	1	0	0	0	0	1	0	0	0	1	0	0	1	0	0	0	1	1	0	1	0	0	0	0	0	0	0	0	0	1	0	0	1	0	0	0	1	0	0	1	0	0	0	1	0	0
276	RUMAR	PO	0	0	0	0	1	0	1	0	0	0	1	0	1	0	0	0	0	1	1	0	1	0	0	0	0	0	0	0	0	0	1	1	0	1	1	0	1	1	0	0	1	0	0	0	1	0	0
277	RUMOB	PO	0	1	0	0	0	0	1	0	0	0	1	0	0	1	0	0	0	1	1	0	1	0	0	0	0	0	0	0	0	0	1	0	0	0	1	0	0	1	0	0	1	0	0	0	1	0	0
278	RUMPU	PO	0	1	0	0	0	0	1	0	0	0	1	0	0	1	0	0	0	1	1	0	1	0	0	0	0	0	0	0	0	0	1	0	0	0	1	0	0	1	0	0	1	0	0	0	0	0	0
[truncated: 3 more columns]

## Sheet: SPECIES
NUMBER	FAMILY	ABBREVIATIONS	GENUS	SPECIES	AUTHOR	ACRONYM
1	AMARANTHACEAE	AM	Atriplex	patula	L.	ATPAT
2	AMARANTHACEAE	AM	Atriplex	rosea	L.	ATROS
3	AMARANTHACEAE	AM	Atriplex	semibaccata	R.Br.	ATSEM
4	AMARANTHACEAE	AM	Atriplex	suberecta	I.Verd.	ATSUB
5	AMARANTHACEAE	AM	Bassia	hyssopifolia	(Pall.) Kuntze	BAHYS
6	AMARANTHACEAE	AM	Beta	vulgaris	L.	BEVUL
7	AMARANTHACEAE	AM	Chenopodium	giganteum	D.Don	CHGIG
8	AMARANTHACEAE	AM	Chenopodium	glaucum	L.	CHGLA
9	AMARANTHACEAE	AM	Chenopodium	murale	L.	CHMUR
10	AMARANTHACEAE	AM	Kochia	scoparia	(L.) Schrad.	KOCSC
11	AMARANTHACEAE	AM	Salsola	tragus	L.	SALTR
12	ASTERACEAE	AS	Anthemis	cotula	L.	ANTCO
13	ASTERACEAE	AS	Artemisia	absinthium	L.	ARTAB
14	ASTERACEAE	AS	Bellis	perennis	L.	BELPE
15	ASTERACEAE	AS	Calendula	officinalis	L.	CALOF
16	ASTERACEAE	AS	Carthamus	tinctorius	L.	CARTI
17	ASTERACEAE	AS	Centaurea	benedicta	(L.) L.	CNIBE
18	ASTERACEAE	AS	Centaurea	melitensis	L.	CENME
19	ASTERACEAE	AS	Centaurea	solstitialis	L.	CENSO
20	ASTERACEAE	AS	Chrysanthemum	coronarium	L.	CHYCO
21	ASTERACEAE	AS	Cichorium	intybus	L.	CIINT
22	ASTERACEAE	AS	Cirsium	vulgare	(Savi) Ten.	CIRVU
23	ASTERACEAE	AS	Cotula	australis	(Sieber ex Spreng.) Hook.f.	COTAU
24	ASTERACEAE	AS	Cotula	coronopifolia	L.	COTCO
25	ASTERACEAE	AS	Cyanthillium	cinereum	(L.) H. Rob.	CYACI
26	ASTERACEAE	AS	Cynara	cardunculus	L.	CYNCA
27	ASTERACEAE	AS	Dendranthema	morifolium	(Ramat.) Tzvelev	DENMO
28	ASTERACEAE	AS	Emilia	fosbergii	Nicolson	EMIFO
29	ASTERACEAE	AS	Emilia	sonchifolia	(L.) DC.	EMISO
30	ASTERACEAE	AS	Guizotia	abyssinica	(L.f.) Cass.	GUIAB
31	ASTERACEAE	AS	Gynura	aurantiaca	Sch.Bip. ex Miq.	GYNAU
32	ASTERACEAE	AS	Hedypnois	rhagadioloides	(L.) F.W.Schmidt	HEDCR
33	ASTERACEAE	AS	Helminthotheca	echioides	(L.) Holub	HELEC
34	ASTERACEAE	AS	Hypochaeris	glabra	L.	HYPGL
35	ASTERACEAE	AS	Hypochaeris	radicata	L.	HYPRA
36	ASTERACEAE	AS	Lactuca	sativa	L.	LACSA
37	ASTERACEAE	AS	Lactuca	serriola	L.	LACSE
38	ASTERACEAE	AS	Lapsana	communis	L.	LAPCO
39	ASTERACEAE	AS	Laphangium	luteoalbum	(L.) Tzvelev	LAPLU
40	ASTERACEAE	AS	Leucanthemum	lacustre	(Brot.) Samp.	LEULA
41	ASTERACEAE	AS	Leucanthemum	vulgare	(Vaill.) Lam.	LEUVU
42	ASTERACEAE	AS	Matricaria	matricarioides	(Less.) Porter	MATMA
43	ASTERACEAE	AS	Rhaponticum	repens	(L.) Hidalgo	RHARE
44	ASTERACEAE	AS	Senecio	inaequidens	DC.	SENIN
45	ASTERACEAE	AS	Senecio	vulgaris	L.	SENVU
46	ASTERACEAE	AS	Silybum	marianum	(L.) Gaertn.	SILMA
47	ASTERACEAE	AS	Soliva	anthemifolia	(Juss.) Sweet	SOLAN
48	ASTERACEAE	AS	Soliva	sessilis	Ruiz & Pav.	SOLSE
49	ASTERACEAE	AS	Sonchus	asper	(L.) Hill	SONAS
50	ASTERACEAE	AS	Sonchus	oleraceus	L.	SONOL
51	ASTERACEAE	AS	Sonchus	tenerrimus	L.	SONTE
52	ASTERACEAE	AS	Tanacetum	parthenium	(L.) Sch.Bip.	TANPA
53	ASTERACEAE	AS	Taraxacum	officinale	F.H. Wigg.	TAROF
54	ASTERACEAE	AS	Tragopogon	porrifolius	L.	TRAPO
55	ASTERACEAE	AS	Youngia	japonica	(L.) DC.	YOUJA
56	BRASSICACEAE	BR	Brassica	juncea	(L.) Czern.	BRAJU
57	BRASSICACEAE	BR	Brassica	napus	L.	BRANA
58	BRASSICACEAE	BR	Brassica	nigra	(L.) W.D.J. Koch	BRANI
59	BRASSICACEAE	BR	Brassica	rapa	L.	BRARA
60	BRASSICACEAE	BR	Brassica	tournefortii	Gouan	BRATO
61	BRASSICACEAE	BR	Cakile	maritima	Scop.	CAKMA
62	BRASSICACEAE	BR	Camelina	sativa	(L.) Crantz	CAMSA
63	BRASSICACEAE	BR	Capsella	bursa pastoris	(L.) Medik.	CAPBU
64	BRASSICACEAE	BR	Cardamine	hirsuta	L.	CARHI
65	BRASSICACEAE	BR	Diplotaxis	muralis	(L.) DC.	DIPMU
66	BRASSICACEAE	BR	Diplotaxis	tenuifolia	(L.) DC.	DIPTE
67	BRASSICACEAE	BR	Eruca	vesicaria	(L.) Cav.	ERUVE
68	BRASSICACEAE	BR	Erucastrum	gallicum	(Willd.) O.E. Schulz	ERUGA
69	BRASSICACEAE	BR	Hirschfeldia	incana	(L.) Lagr.-Foss.	HIRIN
70	BRASSICACEAE	BR	Hornungia	procumbens	(L.) Hayek	HORPR
71	BRASSICACEAE	BR	Iberis	amara	L.	IBEAM
72	BRASSICACEAE	BR	Lepidium	didymum	L.	LEPDI
73	BRASSICACEAE	BR	Lepidium	draba	L.	LEPDR
74	BRASSICACEAE	BR	Lepidium	latifolium	L.	LEPLA
75	BRASSICACEAE	BR	Lobularia	maritima	(L.) Desv.	LOBMA
76	BRASSICACEAE	BR	Matthiola	incana	(L.) W.T. Aiton	MATIN
77	BRASSICACEAE	BR	Nasturtium	officinale	R.Br.	NASOF
78	BRASSICACEAE	BR	Raphanus	raphanistrum	L.	RAPRA
79	BRASSICACEAE	BR	Raphanus	sativus	L.	RAPSA
80	BRASSICACEAE	BR	Rapistrum	rugosum	(L.) All.	RAPRU
81	BRASSICACEAE	BR	Rorippa	dubia	(Pers.) H. Hara	RORDU
82	BRASSICACEAE	BR	Rorippa	palustris	(L.) Besser	RORPA
83	BRASSICACEAE	BR	Sinapis	alba	L.	SINAL
84	BRASSICACEAE	BR	Sinapis	arvensis	L.	SINAR
85	BRASSICACEAE	BR	Sisymbrium	altissimum	L.	SISAL
86	BRASSICACEAE	BR	Sisymbrium	irio	L.	SISIR
87	BRASSICACEAE	BR	Sisymbrium	officinale	(L.) Scop.	SISOF
88	BRASSICACEAE	BR	Sisymbrium	orientale	L.	SISOR
89	BRASSICACEAE	BR	Thlaspi	arvense	L.	THLAR
90	CARYOPHYLLACEAE	CA	Cerastium	glomeratum	Thuill.	CERGL
91	CARYOPHYLLACEAE	CA	Herniaria	cinerea subsp. cinerea		HERCI
92	CARYOPHYLLACEAE	CA	Polycarpon	tetraphyllum	(L.) L.	POLTE
93	CARYOPHYLLACEAE	CA	Saponaria	officinalis	L.	SAPOF
94	CARYOPHYLLACEAE	CA	Scleranthus	annuus	L.	SCLAN
95	CARYOPHYLLACEAE	CA	Silene	gallica	L.	SILGA
96	CARYOPHYLLACEAE	CA	Spergula	arvensis	L.	SPEAR
97	CARYOPHYLLACEAE	CA	Spergularia	bocconei	(Scheele) Asch. & Graebn.	SPEBO
98	CARYOPHYLLACEAE	CA	Stellaria	graminea	L.	STEGR
99	CARYOPHYLLACEAE	CA	Stellaria	montioides	(Edgew. & Hook. f.) Ghaz.	STEMO
100	CARYOPHYLLACEAE	CA	Tissa	villosa	(Pers.) Britton	TISVI
101	CUCURBITACEA	CU	Citrullus	lanatus	(Thunb.) Matsum. & Nakai	CITLA
102	CUCURBITACEA	CU	Cucumis	anguria	L.	CUCAN
103	CUCURBITACEA	CU	Cucumis	dipsaceus	Ehrenb. ex Spach	CUCDI
104	CUCURBITACEA	CU	Cucumis	melo	L.	CUCME
105	CUCURBITACEA	CU	Cucumis	sativus	L.	CUCSA
106	CUCURBITACEA	CU	Lagenaria	siceraria	(Molina) Standl.	LAGSI
107	CUCURBITACEA	CU	Luffa	cylindrica	(L.) M.Roem.	LUFAE
108	CUCURBITACEA	CU	Momordica	balsamina	L.	MOMBA
109	CUCURBITACEA	CU	Momordica	charantia	L.	MOMCH
110	CYPERACEAE	CY	Cyperus	alternifolius	L.	CYPAL
111	CYPERACEAE	CY	Cyperus	difformis	L.	CYPDI
112	CYPERACEAE	CY	Cyperus	esculentus	L.	CYPES
113	CYPERACEAE	CY	Cyperus	involucratus	Rottb.	CYPIN
114	CYPERACEAE	CY	Cyperus	iria	L.	CYPIR
115	CYPERACEAE	CY	Cyperus	oxylepis	Nees ex Steud.	CYPOX
116	CYPERACEAE	CY	Cyperus	rotundus	L.	CYPRO
117	EUPHORBIACEAE	EU	Euphorbia	lathyris	L.	EUPLA
118	EUPHORBIACEAE	EU	Euphorbia	peplus	L.	EUPPE
119	EUPHORBIACEAE	EU	Euphorbia	terracina	L.	EUPTE
120	FABACEAE	FA	Alysicarpus	ovalifolius	(Schumach.) J. Léonard	ALYOV
121	FABACEAE	FA	Alysicarpus	vaginalis	(L.) DC.	ALYVA
122	FABACEAE	FA	Clitoria	ternatea	L.	CLITTE
123	FABACEAE	FA	Crotalaria	retusa	L.	CRORE
124	FABACEAE	FA	Lablab	purpureus	(L.) Sweet	LABPU
125	FABACEAE	FA	Lathyrus	latifolius	L.	LATLA
126	FABACEAE	FA	Lathyrus	tingitanus	L.	LATTI
127	FABACEAE	FA	Medicago	lupulina	L.	MEDLU
128	FABACEAE	FA	Medicago	polymorpha	L.	MEDPO
129	FABACEAE	FA	Medicago	sativa	L.	MEDSA
130	FABACEAE	FA	Melilotus	albus	Medik.	MELAL
131	FABACEAE	FA	Melilotus	indicus	(L.) All.	MELIN
132	FABACEAE	FA	Melilotus	officinalis	(L.) Lam.	MELOF
133	FABACEAE	FA	Pisum	sativum	L.	PISSA
134	FABACEAE	FA	Pueraria	phaseoloides	(Roxb.) Benth.	PUEPH
135	FABACEAE	FA	Securigera	varia	(L.) Lassen	SECVA
136	FABACEAE	FA	Trifolium	dubium	Sibth.	TRIDU
137	FABACEAE	FA	Trifolium	pratense	L.	TRIPR
138	FABACEAE	FA	Trifolium	repens	L.	TRIRE
139	FABACEAE	FA	Vicia	faba	L.	VICFA
140	FABACEAE	FA	Vicia	sativa	L.	VICSA
141	FABACEAE	FA	Vigna	unguiculata	(L.) Walp.	VIGUN
142	PLANTAGINACEAE	PL	Plantago	lanceolata	L.	PLALA
143	PLANTAGINACEAE	PL	Plantago	major	L.	PLAMA
144	PLANTAGINACEAE	PL	Plantago	ovata	Forssk.	PLAOV
145	POACEAE	PA	Aegilops	cylindrica	Host	AEGCY
146	POACEAE	PA	Aira	caryophyllea	L.	AIRCA
147	POACEAE	PA	Anthoxanthum	odoratum	L.	ANTOD
148	POACEAE	PA	Arthraxon	hispidus	(Thunb.) Makino	ARTHI
149	POACEAE	PA	Avena	barbata	Pott ex Link	AVEBA
150	POACEAE	PA	Avena	fatua	L.	AVEFA
151	POACEAE	PA	Avena	sativa	L.	AVESA
152	POACEAE	PA	Bothriochloa	ischaemum	(L.) Keng	BOTIS
153	POACEAE	PA	Bothriochloa	pertusa	(L.) A.Camus	BOTPE
154	POACEAE	PA	Brachiaria	distachya	(L.) Stapf	URODI
155	POACEAE	PA	Brachiaria	mutica	(Forssk.) Stapf.	UROMU
156	POACEAE	PA	Brachiaria	reptans	(L.) C.A.Gardner & C.E.Hubb.	URORE
157	POACEAE	PA	Briza	minor	L.	BRIMI
158	POACEAE	PA	Bromus	catharticus	Vahl	BROCA
159	POACEAE	PA	Bromus	diandrus	Roth	BRODI
160	POACEAE	PA	Bromus	hordeaceus	L.	BROHO
161	POACEAE	PA	Bromus	inermis	Leyss.	BROIN
162	POACEAE	PA	Bromus	japonicus	Houtt.	BROJA
163	POACEAE	PA	Bromus	madritensis	L.	BROMA
164	POACEAE	PA	Bromus	rigidus	Roth	BRORI
165	POACEAE	PA	Bromus	rubens	L.	BRORU
166	POACEAE	PA	Bromus	secalinus	L.	BROSE
167	POACEAE	PA	Bromus	tectorum	L.	BROTE
168	POACEAE	PA	Cenchrus	ciliaris	L.	CENCI
169	POACEAE	PA	Chloris	gayana	Kunth	CHLGA
170	POACEAE	PA	Chrysopogon	zizanioides	(L.) Roberty	CHRZI
171	POACEAE	PA	Coix	lacryma-jobi	L.	COILA
172	POACEAE	PA	Cortaderia	selloana	(Schult. & Schult.f.) Asch. & Graebn.	CORSE
173	POACEAE	PA	Crypsis	vaginiflora	(Forssk.) Opiz	CRYVA
174	POACEAE	PA	Cymbopogon	citratus	(DC.) Stapf	CYMCI
175	POACEAE	PA	Cynodon	dactylon	(L.) Pers.	CYNDA
176	POACEAE	PA	Cynodon	nlemfuensis	Vanderyst	CYNNL
177	POACEAE	PA	Cynodon	plectostachyus	(K.Schum.) Pilg.	CYNPL
178	POACEAE	PA	Cyrtococcum	trigonum	(Retz.) A.Camus	CYRTR
179	POACEAE	PA	Dactylis	glomerata	L.	DACGL
180	POACEAE	PA	Dactyloctenium	aegyptium	(L.) Willd.	DACAE
181	POACEAE	PA	Dichanthium	annulatum	(Forssk.) Stapf	DICAN
182	POACEAE	PA	Dichanthium	aristatum	(Poir.) C.E.Hubb.	DICAR
183	POACEAE	PA	Digitaria	bicornis	(Lam.) Roem. & Schult.	DIGBI
184	POACEAE	PA	Digitaria	ischaemum	(Schreb.) Muhl.	DIGIS
185	POACEAE	PA	Digitaria	nuda	Schumach.	DIGNU
186	POACEAE	PA	Digitaria	eriantha	Steud.	DIGER
187	POACEAE	PA	Digitaria	sanguinalis	(L.) Scop.	DIGSA
188	POACEAE	PA	Digitaria	setigera	Roth	DIGSE
189	POACEAE	PA	Digitaria	ternata	(A.Rich.) Stapf	DIGTE
190	POACEAE	PA	Digitaria	velutina	(Forssk.) P.Beauv.	DIGVE
191	POACEAE	PA	Echinochloa	crus-galli	(L.) P.Beauv.	ECHCR
192	POACEAE	PA	Echinochloa	pyramidalis	(Lam.) Hitchc. & Chase	ECHPY
193	POACEAE	PA	Eleusine	coracana	(L.) Gaertn.	ELECO
194	POACEAE	PA	Eleusine	indica	(L.) Gaertn.	ELEIN
195	POACEAE	PA	Eleusine	multiflora	Hochst. ex A.Rich.	ELEMU
196	POACEAE	PA	Elymus	repens	(L.) Gould	ELYRE
197	POACEAE	PA	Eragrostis	atrovirens	(Desf.) Trin. ex Steud.	ERATR
198	POACEAE	PA	Eragrostis	barrelieri	Daveau	ERBAR
199	POACEAE	PA	Eragrostis	cilianensis	(All.) Vignolo ex Janch.	ERCIL
200	POACEAE	PA	Eragrostis	curvula	(Schrad.) Nees	ERCUR
201	POACEAE	PA	Eragrostis	lehmanniana	Nees	ERIEH
202	POACEAE	PA	Eragrostis	pilosa	(L.) P.Beauv.	ERPIL
203	POACEAE	PA	Eragrostis	superba	Peyr.	ERSUP
204	POACEAE	PA	Eragrostis	viscosa	(Retz.) Trin.	ERVIS
205	POACEAE	PA	Euclasta	condylotricha	(Hochst. ex Steud.) Stapf	EUCCO
206	POACEAE	PA	Festuca	arundinacea	Schreb.	FESAR
207	POACEAE	PA	Festuca	ovina	L.	FESOV
208	POACEAE	PA	Gastridium	ventricosum	(Gouan) Schinz & Thell.	GASVE
209	POACEAE	PA	Glyceria	fluitans	(L.) R.Br.	GLYFL
210	POACEAE	PA	Hackelochloa	granularis	(L.) Kuntze	HACGR
211	POACEAE	PA	Hainardia	cylindrica	(Willd.) Greuter	HAICY
212	POACEAE	PA	Hemarthria	altissima	(Poir.) Stapf & C.E.Hubb.	HEMAL
213	POACEAE	PA	Holcus	lanatus	L.	HOLAN
214	POACEAE	PA	Hordeum	marinum subsp. gussoneanum	(Parl.) Thell.	HOMAR
215	POACEAE	PA	Hordeum	murinum	L.	HOMUR
216	POACEAE	PA	Hordeum	vulgare	L.	HOVUL
217	POACEAE	PA	Hyparrhenia	hirta	(L.) Stapf	HYHIR
218	POACEAE	PA	Hyparrhenia	rufa	(Nees) Stapf	HYRUF
219	POACEAE	PA	Hyperthelia	dissoluta	(Nees ex Steud.) Clayton	HYPDI
220	POACEAE	PA	Ischaemum	rugosum	Salisb.	ISCRU
221	POACEAE	PA	Lamarckia	aurea	(L.) Moench	LAMAU
222	POACEAE	PA	Lolium	multiflorum	Lam.	LOLMU
223	POACEAE	PA	Lolium	perenne	L.	LOLPE
224	POACEAE	PA	Lolium	temulentum	L.	LOLTE
225	POACEAE	PA	Panicum	maximum	Jacq.	MEGMA
226	POACEAE	PA	Melinis	minutiflora	P.Beauv.	MELMI
227	POACEAE	PA	Melinis	repens	(Willd.) Zizka	MELRE
228	POACEAE	PA	Miscanthus	sinensis	Andersson	MISIN
229	POACEAE	PA	Panicum	antidotale	Retz.	PANAN
230	POACEAE	PA	Panicum	miliaceum	L.	PANMI
231	POACEAE	PA	Parapholis	incurva	(L.) C.E.Hubb.	PARIN
232	POACEAE	PA	Pennisetum	clandestinum	Hochst. ex Chiov.	PENCL
233	POACEAE	PA	Pennisetum	glaucum	(L.) R.Br.	PENGL
234	POACEAE	PA	Pennisetum	purpureum	Schumach.	PENPU
235	POACEAE	PA	Pennisetum	setaceum	(Forssk.) Chiov.	PENSE
236	POACEAE	PA	Pennisetum	villosum	Fresen.	PENVI
237	POACEAE	PA	Phalaris	brachystachys	Link	PHABR
238	POACEAE	PA	Phalaris	canariensis	L.	PHACA
239	POACEAE	PA	Phalaris	minor	Retz.	PHAMI
240	POACEAE	PA	Phalaris	paradoxa	L.	PHAPA
241	POACEAE	PA	Phleum	pratense	L.	PHLPR
242	POACEAE	PA	Poa	annua	L.	POAAN
243	POACEAE	PA	Poa	compressa	L.	POACO
244	POACEAE	PA	Poa	nemoralis	L.	POANE
245	POACEAE	PA	Poa	pratensis	L.	POAPR
246	POACEAE	PA	Polypogon	monspeliensis	(L.) Desf.	POLYM
247	POACEAE	PA	Polypogon	viridis	(Gouan) Breistr.	POLYV
248	POACEAE	PA	Rottboellia	cochinchinensis	(Lour.) Clayton	ROTCO
249	POACEAE	PA	Saccharum	officinarum	L.	SACOF
250	POACEAE	PA	Saccharum	villosum	Steud.	SACVI
251	POACEAE	PA	Schismus	barbatus	(L.) Thell.	SCHBA
252	POACEAE	PA	Secale	cereale	L.	SECCE
253	POACEAE	PA	Setaria	sphacelata	(Schumach.) Stapf & C.E.Hubb. ex M.B.Moss	SETSP
254	POACEAE	PA	Setaria	viridis	(L.) P.Beauv.	SETVI
255	POACEAE	PA	Sorghum	arundinaceum	(Desv.) Stapf	SORAR
256	POACEAE	PA	Sorghum	bicolor	(L.) Moench	SORBI
257	POACEAE	PA	Sorghum	halepense	(L.) Pers.	SORHA
258	POACEAE	PA	Sorghum	X almum	Parodi (pro sp.)	SORAL
259	POACEAE	PA	Tragus	berteronianus	Schult.	TRABE
260	POACEAE	PA	Urochloa	panicoides	P.Beauv.	UROPA
261	POACEAE	PA	Vulpia	bromoides	(L.) Gray	VULBR
262	POACEAE	PA	Vulpia	myuros (L.) C.C.Gmel.	(L.) C.C.Gmel.	VULMY
263	POACEAE	PA	Zoysia	matrella	(L.) Merr.	ZOYMA
264	POLYGONACEAE	PO	Fagopyrum	esculentum	Moench	FAGES
265	POLYGONACEAE	PO	Fallopia	convolvulus	(L.) Á.Löve	FALCO
266	POLYGONACEAE	PO	Muehlenbeckia	complexa	(A. Cunn) Meisn.	MUECO
267	POLYGONACEAE	PO	Persicaria	hydropiper	(L.) Delarbre	PERHY
268	POLYGONACEAE	PO	Persicaria	lapathifolia	(L.) Delarbre	PERLA
269	POLYGONACEAE	PO	Persicaria	maculosa	Gray	PERMA
270	POLYGONACEAE	PO	Polygonum	arenastrum	Boreau	POLAR
271	POLYGONACEAE	PO	Polygonum	argyrocoleon	Steud. ex Kunze	POLRG
272	POLYGONACEAE	PO	Polygonum	aviculare	L.	POLAV
273	POLYGONACEAE	PO	Rumex	acetosella	L.	RUMAC
274	POLYGONACEAE	PO	Rumex	conglomeratus	Murray	RUMCO
275	POLYGONACEAE	PO	Rumex	crispus	L.	RUMCR
276	POLYGONACEAE	PO	Rumex	maritimus	L.	RUMAR
277	POLYGONACEAE	PO	Rumex	obtusifolius	L.	RUMOB
278	POLYGONACEAE	PO	Rumex	pulcher	L.	RUMPU

## Sheet: KEY
NUM	Number of species				Biological attributes					Dispersal syndrome					Size of the dispersal propagule (fruit and seed)
ACRO	Acronyms				Life cycle					AN	Anemochory				VS	Very small: 0-1.5 mm
					A	Annual				AU	Autochory				S	Small: 1.6-3.5 mm
FAM	Family				P	Perennial				BA	Barochory				M	Medium: 3.6-7.5 mm
AM	AMARANTHACEAE				AB	Annual-Biannual				HY	Hidrochory				L	Large: 7.6-49 mm
AS	ASTERACEAE				AP	Annual-Perennial				ZO	Zoocory				VL	Very large: 50-1000 mm
BR	BRASSICACEAE			*	ABP	Annual-Biannual-Perennial
CA	CARYOPHYLLACEAE			*	BP	Biannual- Perennial				Dispersal distance					Uses
CAS	CASUARINACEAE									N	Near: Barochory			*	CRA	Crafts
CU	CUCURBITACEAE				Life form					AV	Average or median: Autochory				COM	Comestible or food
CY	CYPERACEAE				HE	Herbs				H	High: Anemochory, Hidrochory, Zoochory				ER	Erosion or the stabilization of dunes
EU	EUPHORBIACEAE				VH	Vine and climbing herbs				MU	Multiple: More than two dispersal syndromes				FO	Forage
FA	FABACEAE			*	SS	Subshrubs									ME	Medicinal
PHY	PHYLLANTHACEAE									Type of fruit and dehiscence					OR	Ornament
PL	PLANTAGINACEAE				Classes of Angiosperms					ID	Indehiscent fruits
PA	POACEAE				MO	Monocotyledons				DE	Dehiscent fruits			*	Variables excluded from NMDS and COSA analyses
PO	POLYGONACEAE				DI	Dicotyledons				DF	Dry fruits
									*	FF	Fleshy fruit
Biological attributes and usages					Growth forms					AC	Achene
0	Absence			*	CHA	Chamaephyte				CA	Capsule
1	Presence				GEO	Geophythe				CR	Caryopsis
					HEM	Hemicryptophyte				CY	Cypsela
				*	HYD	Hydrophyte			*	BE	Berry
					THE	Therophyte				LE	Legume or pod
									*	LM	Loment
									*	PY	Pyxis
										SI	Siliqua or silique
									*	UT	Utricle
